# Supplementary material for: Association between Maternal Serum Perfluoroalkyl Substances during Pregnancy and Maternal and Cord Thyroid Hormones: Taiwan Maternal and Infant Cohort Study
Source: PubMed Central journal article supplement (PMC4014761; doi:10.1289/ehp.1306925), 2014-02-21
Supplement: ehp.1306925.s001.pdf [file ehp.1306925.s001.pdf]

## **Supplemental Material**

### **Association between Maternal Serum Perfluoroalkyl Substances during Pregnancy and Maternal and Cord Thyroid Hormones: Taiwan Maternal and Infant Cohort Study**

Yan Wang, Walter J. Rogan, Pau-Chung Chen, Guang-Wen Lien, Hsiao-Yen Chen, Ying-Chih Tseng, Matthew P. Longnecker, and Shu-Li Wang

| <b>Table of Contents</b>                                                                                                                | <b>Page</b> |
|-----------------------------------------------------------------------------------------------------------------------------------------|-------------|
| <b>Table S1.</b> Spearman Correlation Coefficients among Maternal PFASs.                                                                | 2           |
| <b>Table S2.</b> Linear Regression Coefficients for Associations between Maternal PFASs and Maternal Thyroid Hormones (ln-transformed). | 3           |
| <b>Table S3.</b> Linear Regression Coefficients for Associations between Maternal PFASs and Cord Thyroid Hormones (ln-transformed).     | 4           |

**Table S1.** Spearman Correlation Coefficients among Maternal PFASs.

|        | <b>PFHxS</b> | <b>PFOA</b> | <b>PFOS</b> | <b>PFNA</b> | <b>PFDeA</b> | <b>PFUnDA</b> | <b>PFDoDA</b> |
|--------|--------------|-------------|-------------|-------------|--------------|---------------|---------------|
| PFHxS  | 1            | 0.19*       | 0.18*       | 0.11        | 0.07         | -0.01         | 0.05          |
| PFOA   |              | 1           | 0.43**      | 0.28**      | 0.28**       | 0.17*         | 0.22*         |
| PFOS   |              |             | 1           | 0.22*       | 0.39**       | 0.11          | 0.16*         |
| PFNA   |              |             |             | 1           | 0.62**       | 0.89**        | 0.90**        |
| PFDeA  |              |             |             |             | 1            | 0.57**        | 0.58**        |
| PFUnDA |              |             |             |             |              | 1             | 0.87**        |
| PFDoDA |              |             |             |             |              |               | 1             |

Abbreviations: PFHxS, perfluorohexanesulfonic acid; PFOA, perfluorooctanoic acid; PFOS, perfluorooctane sulfonate; PFNA, perfluorononanoic acid; PFDeA, perfluorodecanoic acid; PFUnDA, perfluoroundecanoic acid; PFDoDA, perfluorododecanoic acid. Units of PFASs are in ng/mL.

\*  $p < 0.05$ , \*\*  $p < 0.001$ .

**Table S2.** Linear Regression Coefficients (95% CI) for Associations between Maternal PFASs and Maternal Thyroid Hormones (ln-transformed).

| <b>Maternal PFAS<sup>a</sup></b> | <b>Free T4 (N = 285)<sup>b</sup></b> | <b>Total T4 (N = 274)<sup>b</sup></b> | <b>Total T3 (N = 276)<sup>b</sup></b> | <b>TSH (N = 283)<sup>b</sup></b> |
|----------------------------------|--------------------------------------|---------------------------------------|---------------------------------------|----------------------------------|
| PFHxS                            | -0.015 (-0.036, 0.007)               | -0.010 (-0.027, 0.007)                | -0.011 (-0.031, 0.010)                | 0.061 (0.010, 0.111)*            |
| PFOA                             | -0.006 (-0.020, 0.008)               | 0.004 (-0.008, 0.015)                 | 0.001 (-0.013, 0.014)                 | 0.024 (-0.008, 0.056)            |
| PFOS                             | 0.001 (-0.003, 0.005)                | 0.002 (-0.001, 0.005)                 | 0.003 (-0.001, 0.007)                 | 0.001 (-0.008, 0.010)            |
| PFNA                             | -0.032 (-0.048, -0.016)***           | -0.017 (-0.030,-0.003)*               | -0.002 (-0.018, 0.014)                | 0.026 (-0.013, 0.065)            |
| PFDeA                            | -0.000 (-0.009, 0.008)               | 0.004 (-0.003, 0.011)                 | 0.008 (0.000, 0.017)**                | 0.005 (-0.016, 0.025)            |
| PFUnDA                           | -0.007 (-0.011, -0.003)***           | -0.006 (-0.009,-0.002)***             | -0.002 (-0.006, 0.002)                | 0.005 (-0.004, 0.015)            |
| PFDoDA                           | -0.217 (-0.335, -0.099)***           | -0.149 (-0.246,-0.053)**              | -0.030 (-0.146, 0.086)                | 0.194 (-0.094, 0.482)            |

Abbreviations: CI, confidence interval; PFHxS, perfluorohexanesulfonic acid; PFOA, perfluorooctanoic acid; PFOS, perfluorooctane sulfonate; PFNA, perfluorononanoic acid; PFDeA, perfluorodecanoic acid; PFUnDA, perfluoroundecanoic acid; PFDoDA, perfluorododecanoic acid; T3, triiodothyronine; T4, thyroxine; TSH, thyroid stimulating hormone. Units of PFASs are ng/mL. Unit of TSH is  $\mu$ IU/mL, units of free T4 and total T3 are ng/dL and unit of total T4 is  $\mu$ g/dL.

<sup>a</sup>Values below LOQ were imputed based on expected values assuming a log-normal distribution. <sup>b</sup>Maternal thyroid hormones were ln-transformed. Numbers varied because of missing data for thyroid hormones. Models were adjusted for maternal age, maternal education levels and maternal previous live births.

\* $p < 0.05$ ; \*\*  $p < 0.01$ ; \*\*\*  $p < 0.001$ .

**Table S3.** Linear Regression Coefficients (95% CI) for Associations between Maternal PFASs and Cord Thyroid Hormones (ln-transformed).

| <b>Maternal PFAS<sup>a</sup></b> | <b>Free T4 (N = 92)<sup>b</sup></b> | <b>Total T4 (N = 116)<sup>b</sup></b> | <b>Total T3 (N = 112)<sup>b</sup></b> | <b>TSH (N = 114)<sup>b</sup></b> |
|----------------------------------|-------------------------------------|---------------------------------------|---------------------------------------|----------------------------------|
| PFHxS                            | -0.010 (-0.097, 0.077)              | -0.029 (-0.100, 0.042)                | -0.007 (-0.099, 0.084)                | 0.095 (-0.062, 0.252)            |
| PFOA                             | -0.005 (-0.042, 0.033)              | -0.013 (-0.048, 0.023)                | -0.020 (-0.066, 0.026)                | 0.019 (-0.051, 0.089)            |
| PFOS                             | 0.004 (-0.006, 0.013)               | 0.002 (-0.006, 0.009)                 | 0.003 (-0.007, 0.012)                 | 0.001 (-0.016, 0.019)            |
| PFNA                             | 0.002 (-0.030, 0.034)               | -0.022 (-0.044, -0.000)*              | -0.041 (-0.068, -0.014)**             | -0.014 (-0.068, 0.040)           |
| PFDeA                            | 0.065 (-0.136, 0.266)               | -0.125 (-0.284, 0.035)                | -0.325 (-0.522, -0.127)**             | -0.183 (-0.560, 0.193)           |
| PFUnDA                           | 0.002 (-0.006, 0.010)               | -0.006 (-0.011, -0.000)*              | -0.012 (-0.018, -0.005)***            | -0.004 (-0.017, 0.010)           |
| PFDoDA                           | 0.022 (-0.230, 0.273)               | -0.223 (-0.404, -0.042)*              | -0.408 (-0.636, -0.181)***            | 0.026 (-0.430, 0.482)            |

Abbreviations: CI, confidence interval; PFHxS, perfluorohexanesulfonic acid; PFOA, perfluorooctanoic acid; PFOS, perfluorooctane sulfonate; PFNA, perfluorononanoic acid; PFDeA, perfluorodecanoic acid; PFUnDA, perfluoroundecanoic acid; PFDoDA, perfluorododecanoic acid; T3, triiodothyronine; T4, thyroxine; TSH, thyroid stimulating hormone. Units of PFASs are ng/mL. Unit of TSH is  $\mu$ IU/mL, units of free T4 and total T3 are ng/dL and unit of total T4 is  $\mu$ g/dL.

<sup>a</sup>Values below LOQ were imputed based on expected values assuming a log-normal distribution. <sup>b</sup>Maternal thyroid hormones were ln-transformed. Numbers varied because of missing data with thyroid hormones. Models were adjusted for maternal age, maternal education levels and maternal previous live births.

\*  $p < 0.05$ ; \*\*  $p < 0.01$ ; \*\*\*  $p < 0.001$ .
